# Supplementary material for: Effect of Glycerol on Fosfomycin Activity against Escherichia coli
Source: MDPI journal article supplement (doi:10.3390/antibiotics11111612), 2022-11-12
Supplement: s1 [file s1]

# Supplementary Materials:

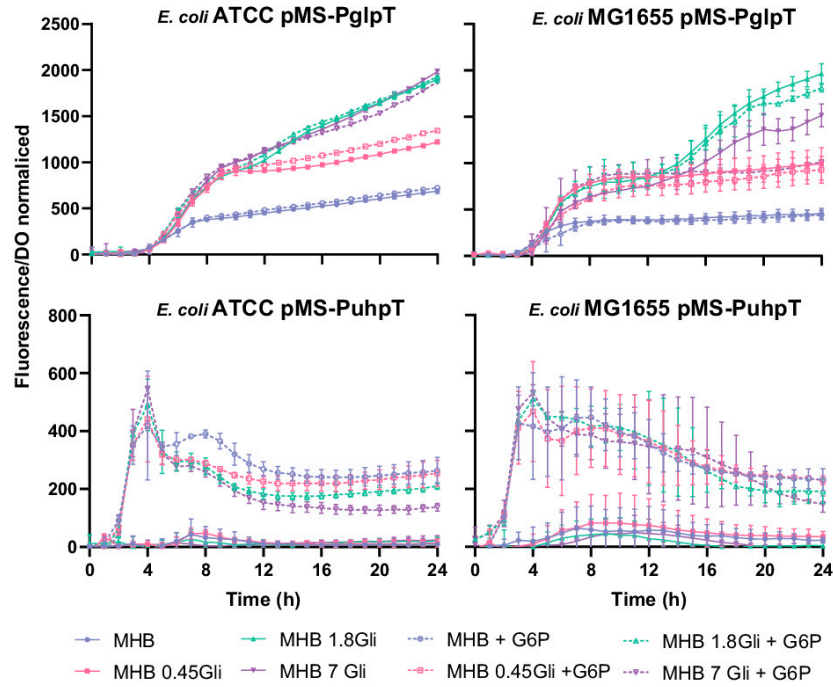

**Figure S1.** Assay of promoter activities in response to glycerol (GLY) and glucose-6-phosphate (G6P). Time-course quantification of GFP expression as a measure of induction of the *glpT* and *uhpT* genes in the ATCC25922 and MG1655 strains after 4, 12, and 24 h of exposure. The data were normalized to promoterless strains. Error bars represent standard deviations. Concentrations of glycerol (Gly) of 0.45, 1.8, and 7 mg/mL and glucose-6-phosphate (G6P) of 25 mg/L were used as inductors;.

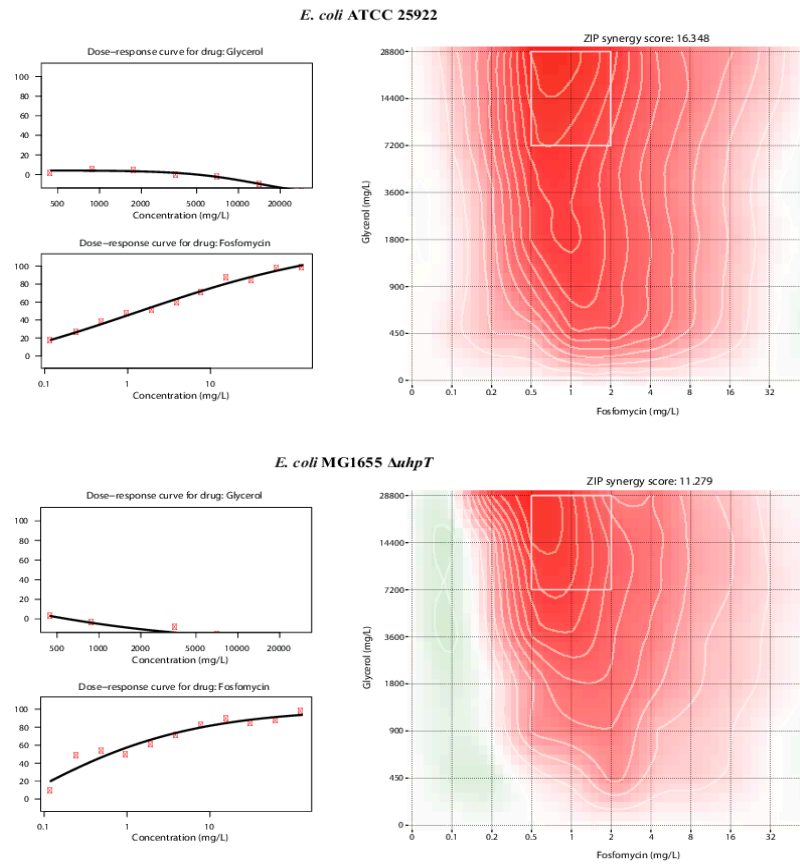

**Figure S2.** Interaction assay of fosfomycin in combination with glycerol against *Escherichia coli* ATCC25922 and MG1655 strains, represented as heat maps. The red and green areas represent synergy and antagonism, respectively. The white rectangles show the maximum synergistic area. The concentration-response curves for fosfomycin and glycerol alone are found on the left side of each heatmap.

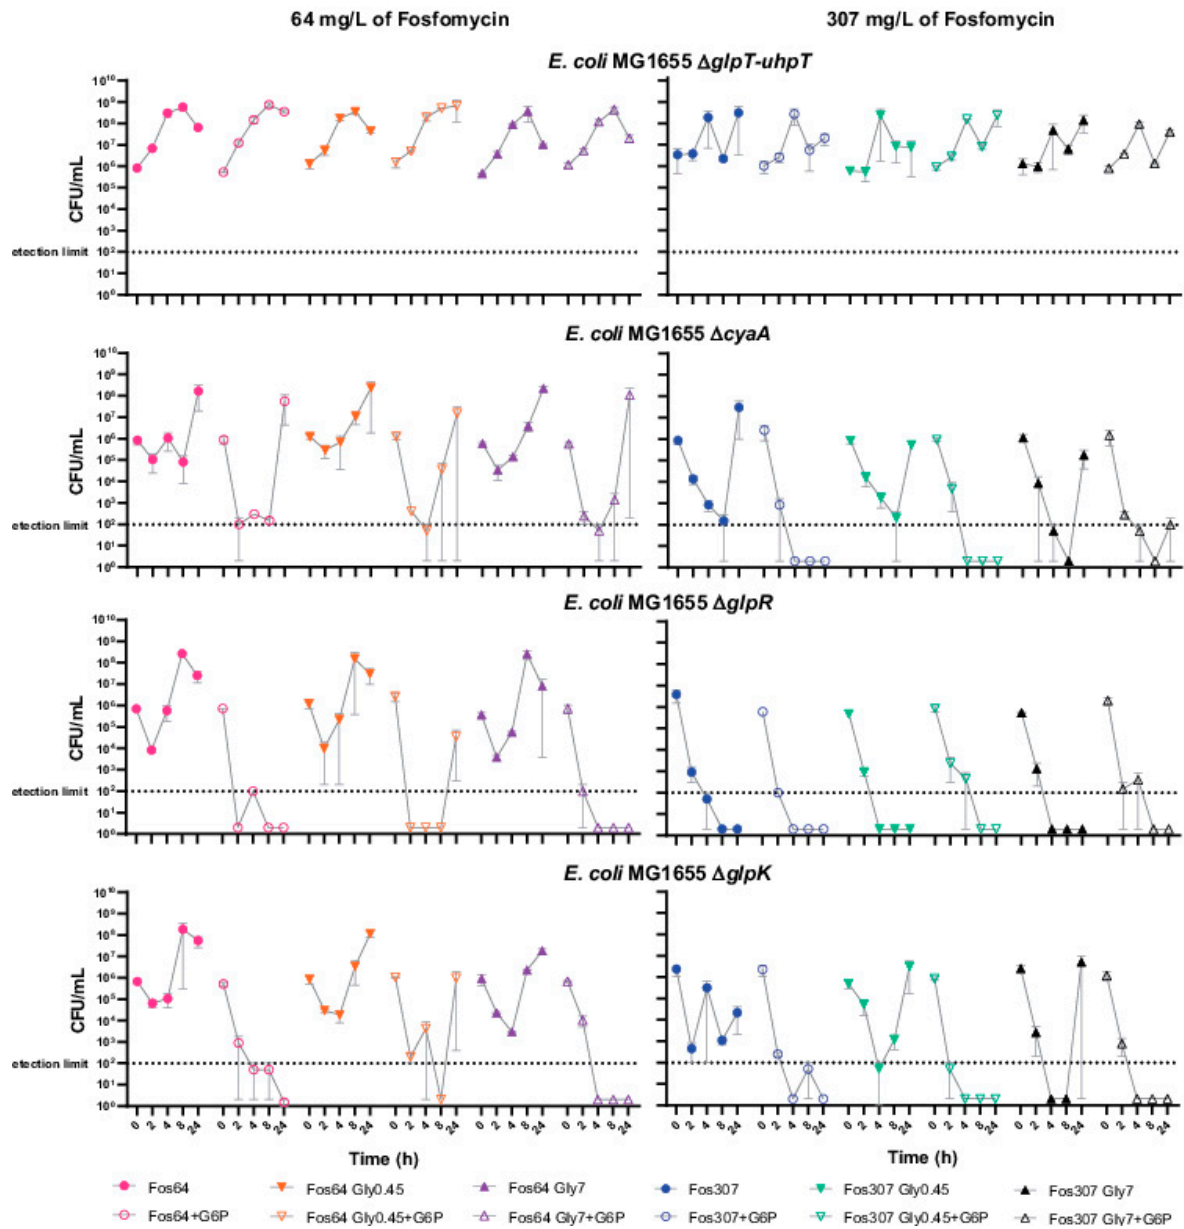

**Figure S3.** Time-kill assays of fosfomycin alone and in combination with glycerol (0.45 and 7 mg/L) and/or glucose-6-phosphate (G6P, 25 mg/L) against *E. coli* wild-type *E. coli* MG1655 mutant derivative strains ( $\Delta glpT-uhpT$ ,  $\Delta cyaA$ ,  $\Delta glpR$ , and  $\Delta glpK$ ), at 0, 2, 4, 8, and 24 h. Bacterial concentrations (CFU/mL) are represented as symbols for mean and range.
